# Supplementary material for: Design and identification of poly(vinyl chloride)/layered double hydroxide@MnO2nanocomposite films and evaluation of the methyl orange uptake: linear and non-linear isotherm and kinetic adsorption models
Source: Royal Society of Chemistry journal article supplement (doi:10.1039/d0nj01162b), 2020-01-01
Supplement: d0nj01162b1.pdf [file d0nj01162b1.pdf]

**Supporting Information for:**

**Design and identification of poly(vinyl chloride)/layered double hydroxide@MnO<sub>2</sub> nanocomposite films and evaluation of methyl orange uptake: Linear and non-linear isotherm and kinetic adsorption models**

**Shadpour Mallakpour \*, Mina Naghdi**

Organic Polymer Chemistry Research Laboratory, Department of Chemistry, Isfahan University of Technology, Isfahan, 84156-83111, Islamic Republic of Iran

---

\* Corresponding author at. Organic Polymer Chemistry Research Laboratory, Department of Chemistry, Isfahan University of Technology, Isfahan, 84156–83111, I. R. Iran.

*E-mail address:* [mallak@iut.ac.ir](mailto:mallak@iut.ac.ir), [mallak777@yahoo.com](mailto:mallak777@yahoo.com) (S. Mallakpour).

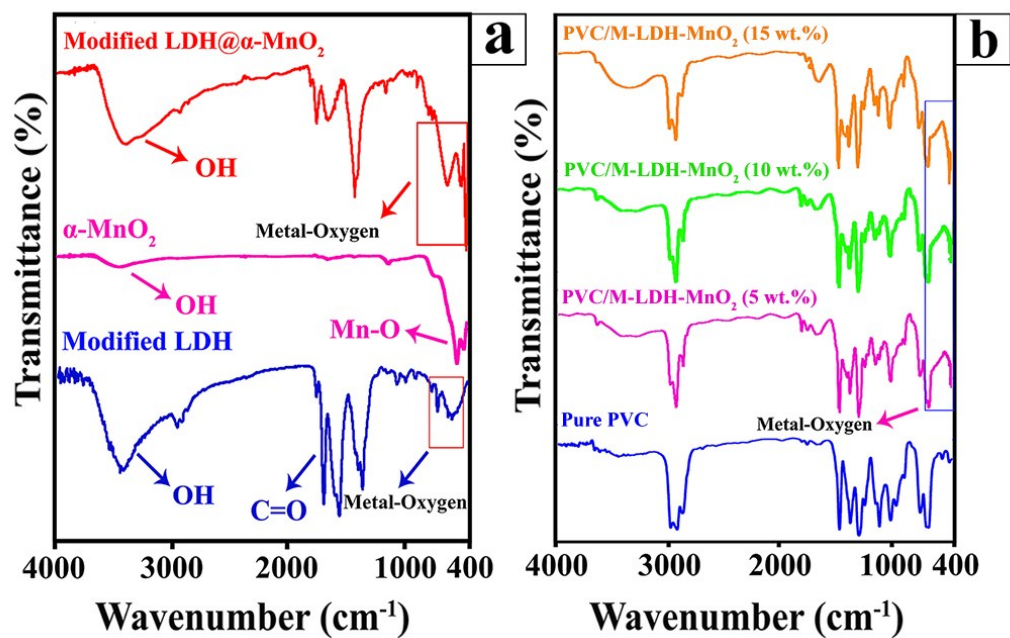

**Figure S1** FTIR spectra of the (a) M-LDH,  $\alpha$ -MnO<sub>2</sub> nano-rods, and M-LDH@MnO<sub>2</sub> hybrid nano-filler (b) Pure PVC and PVC/M-LDH@MnO<sub>2</sub> nanocomposite films (5, 10, and 15 wt.%).

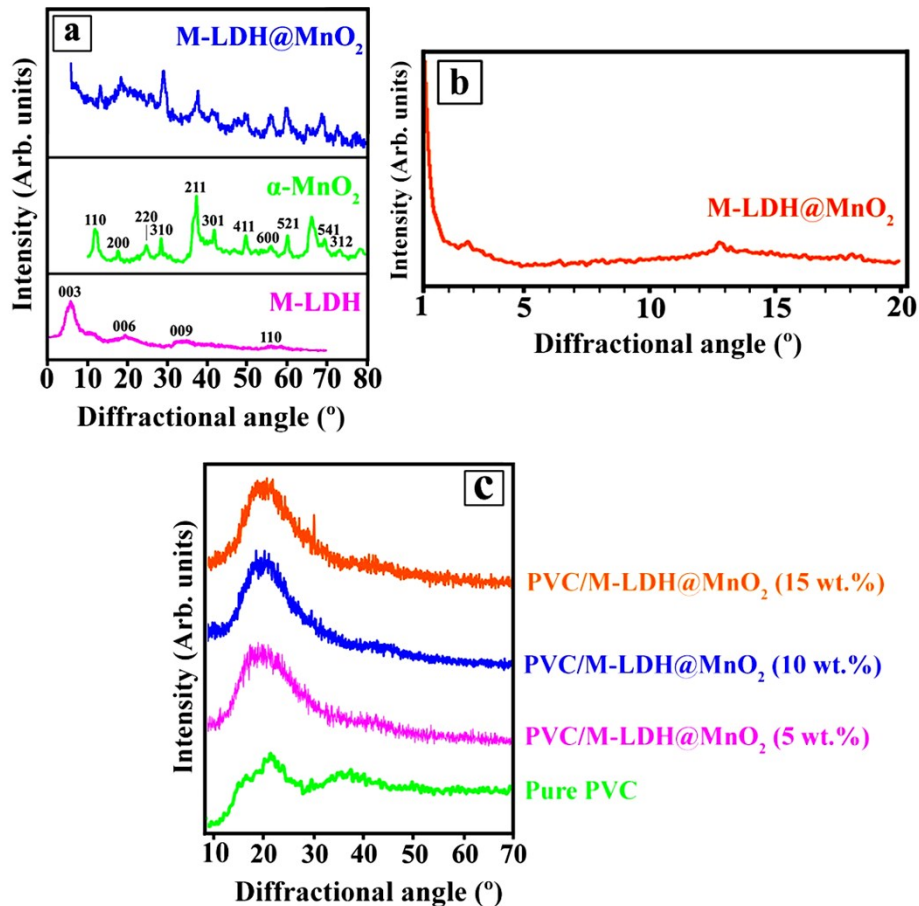

**Figure S2** (a) XRD patterns of the M-LDH,  $\alpha$ -MnO<sub>2</sub> nano-rods, and M-LDH@MnO<sub>2</sub> hybrid nano-filler, (b) low angle XRD of the M-LDH@MnO<sub>2</sub> hybrid nano-filler, (c) XRD patterns of pure PVC, and PVC/M-LDH@MnO<sub>2</sub> nanocomposite films (5, 10, and 15 wt.%).

**Table S1** Atomic percentages from EDX spectra of  $\alpha$ -MnO<sub>2</sub> nano-rods, M-LDH, M-LDH@MnO<sub>2</sub> hybrid nano-filler, and PVC/M-LDH@MnO<sub>2</sub> nanocomposite 15 wt.%.

| Sample                                           | Atomic percentage |       |      |      |       |       |       |       |
|--------------------------------------------------|-------------------|-------|------|------|-------|-------|-------|-------|
|                                                  | K                 | Mn    | Mg   | Al   | O     | N     | C     | Cl    |
| $\alpha$ -MnO <sub>2</sub> nano-rods             | 7.2               | 46.45 | -    | -    | 46.35 | -     | -     | -     |
| M-LDH                                            | -                 | -     | 5.70 | 3.26 | 52.44 | 15.87 | 22.73 | -     |
| M-LDH@MnO <sub>2</sub> hybrid nano-filler        | 1.17              | 6.51  | 3.73 | 1.88 | 56.05 | 7.56  | 23.1  | -     |
| PVC/M-LDH@MnO <sub>2</sub> nanocomposite 15 wt.% | -                 | 0.55  | 0.50 | 0.22 | 5.04  | 3.89  | 65.33 | 24.27 |

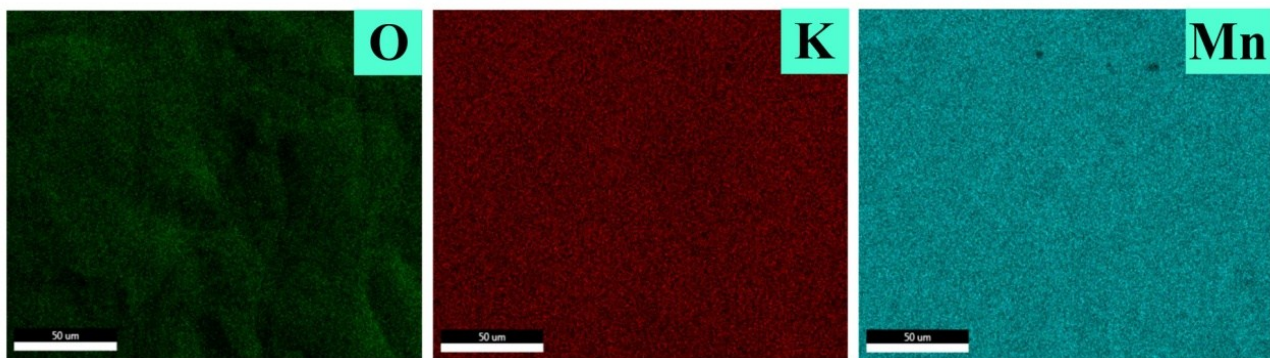

**Figure S3** Mapping of  $\alpha$ -MnO<sub>2</sub> nano-rods.

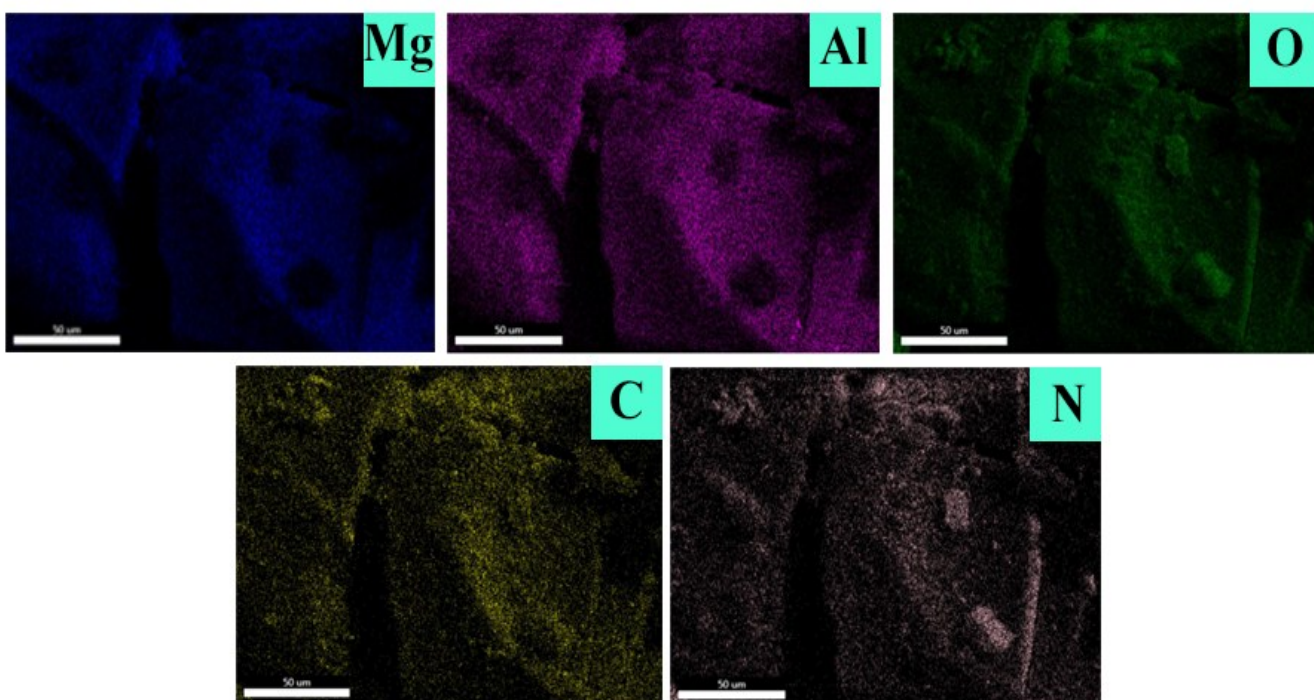

**Figure S4** Mapping of M-LDH.

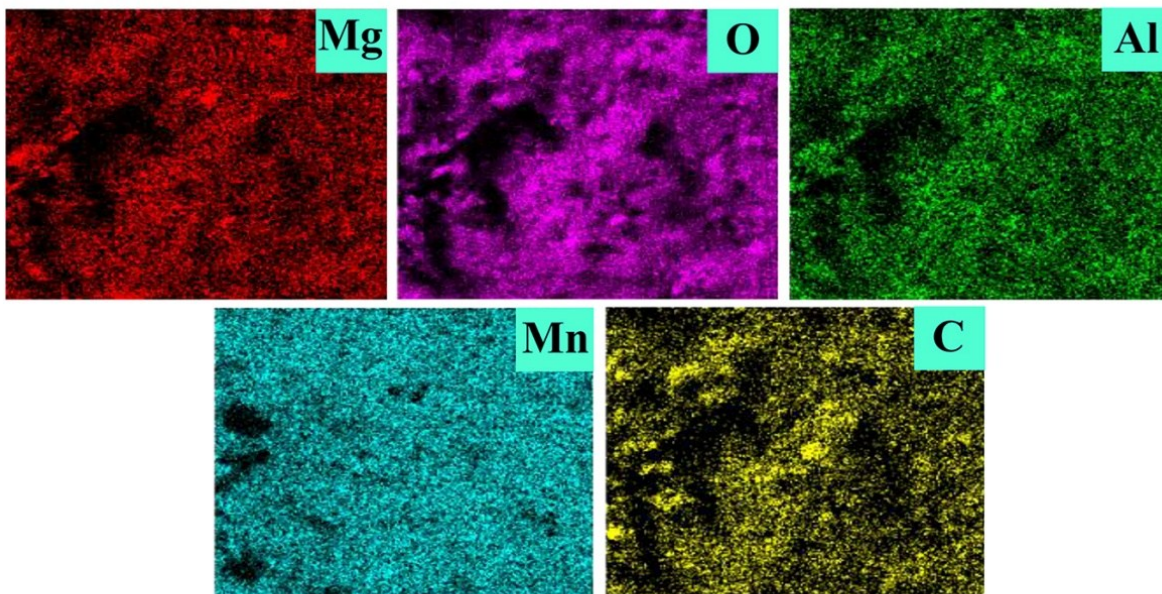

**Figure S5** Mapping of M-LDH@MnO<sub>2</sub> hybrid nano-filler.

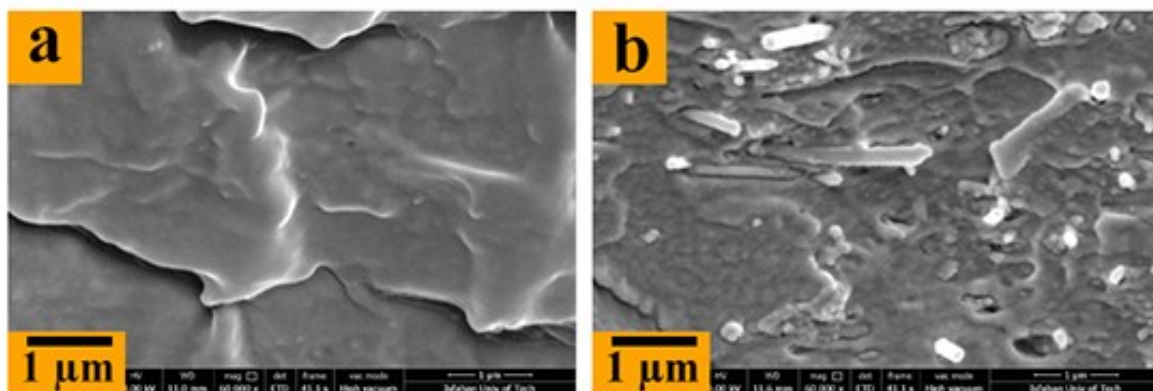

**Figure S6** Cross-sectional FESEM images of the (a) PVC and (b) PVC/M-LDH@MnO<sub>2</sub> nanocomposite 10 wt.%.

**Table S2** Pore structural information for the M-LDH, M-LDH@MnO<sub>2</sub> hybrid nano-filler, and PVC/M-LDH@MnO<sub>2</sub> nanocomposite 15 wt.%.

| Sample                                              | Mean pore diameter<br>(nm) | Total pore volume<br>(cm <sup>3</sup> /g) | Reference |
|-----------------------------------------------------|----------------------------|-------------------------------------------|-----------|
| M-LDH                                               | 38.86                      | 0.007                                     | 1         |
| M-LDH@MnO <sub>2</sub> hybrid<br>nano-filler        | 32.35                      | 0.222                                     | This work |
| PVC/M-LDH@MnO <sub>2</sub><br>nanocomposite 15 wt.% | 34.95                      | 0.224                                     | This work |

**Table S3** Char yield values for the  $\alpha$ -MnO<sub>2</sub> nano-rods, M-LDH, and M-LDH@MnO<sub>2</sub> hybrid nano-filler.

| Sample                                       | Char yield (%) <sup>a</sup> | Reference |
|----------------------------------------------|-----------------------------|-----------|
| $\alpha$ -MnO <sub>2</sub> nano-rods         | 92                          | 2         |
| M-LDH                                        | 44                          | 1         |
| M-LDH@MnO <sub>2</sub><br>hybrid nano-filler | 59                          | This work |

<sup>a</sup> Weight (%) of undecomposed sample after heating at 800 °C.

**Table S4** Equations for the isotherm, kinetic, Intraparticle, and liquid film diffusion models.

| Model                                 | Linear                                            |
|---------------------------------------|---------------------------------------------------|
| Langmuir (linear form)                | $C_e/Q_e = 1/(Q_m K_L) + C_e/Q_m$                 |
| Langmuir (non-linear form)            | $Q_e = (Q_m \times C_e \times K_L)/(1 + C_e K_L)$ |
| Freundlich (linear form)              | $\ln Q_e = \ln K_F + 1/n \ln C_e$                 |
| Freundlich (non-linear form)          | $Q_e = K_F \times C_e^{1/n}$                      |
| Pseudo-first order (linear form)      | $\ln (Q_e - Q_t) = \ln Q_e - k_1 t$               |
| Pseudo-first order (non-linear form)  | $Q_t = Q_e[1 - \exp(-k_1 t)]$                     |
| Pseudo-second order (linear form)     | $t/Q_t = 1/k_2 Q_e^2 + t/Q_e$                     |
| Pseudo-second order (non-linear form) | $Q_t = Q_e^2 k_2 t / (1 + Q_e k_2 t)$             |
| Weber's intraparticle diffusion       | $Q_t = k_{ip} t^{0.5} + C$                        |
| Liquid film diffusion                 | $\ln (1-F) = k_{fd} \cdot t$                      |

**Table S5**  $r^2$  and errors' mathematical equations.

| Parameters | Relationships                                                                                                                          |
|------------|----------------------------------------------------------------------------------------------------------------------------------------|
| $r^2$      | $\frac{\sum_{i=1}^n (y_{,exp} - \bar{y}_{,cal})^2}{\sum_{i=1}^n (y_{,exp} - \bar{y}_{,cal})^2 + \sum_{i=1}^n (y_{,exp} - y_{,cal})^2}$ |
| RMSE       | $\sqrt{\frac{1}{n} \sum_{i=1}^n (y_{,exp} - y_{,cal})^2}$                                                                              |
| $\chi^2$   | $\sum_{i=1}^n \frac{(y_{,exp} - y_{,cal})^2}{y_{,cal}}$                                                                                |
| SSE        | $\sum_{i=1}^n (y_{,exp} - y_{,cal})^2$                                                                                                 |

## References

1. S. Mallakpour and M. Hatami, *Appl. Clay Sci.*, 2017, **149**, 28-40.
2. S. Mallakpour, A. Abdolmaleki and H. Tabebordbar, *Europ. Polym. J.*, 2016, **78**, 141-152.
